# Supplementary material
Source: publisher site journal article supplement (https://jmir.org/api/download?alt_name=derma_v3i1e15711_app1.docx&filename=59eb0cdf06ab1093df77a76161057aab.docx)
Supplement: Supplementary file 1 [file download]

**Table 3.** Themes endorsed by parents and children on the open-ended feasibility questions.

| Themes | Parents (n=97),  n (%) | Children (n=97), n (%) | Example quotations |
| --- | --- | --- | --- |
| **What did you like about the Shade device?** |  |  |  |
| Ease of use | 37 (41.6)a | 28 (31.8)b | - “It was simple to wear and stayed securely on my clothing.” [Child] - “It was simple to wear. I liked that it had a strong magnet that kept it in place.” [Parent] |
| Size of the device | 16 (17.9)a | 14 (15.9)b | - “I like that it was light and hardly noticeable.” [Child] - “It was small and not very obvious.” [Parent] |
| Awareness | 30 (33.7)a | 8 (9.01)b | - “Makes me think about how much time I spend in the sun.” [Child] - “It got me thinking about my UV exposure, and my kids’ UV exposure. I think if I could see my actual UV exposure...I would be even more inclined to use it.” [Parent] |
| Gave reminders for correct use | 6 (6.74)a | 9 (10.2)b | - “I thought it was really wise to have it be a magnet and also that it vibrated so you were aware if you accidentally covered it.” [Child] - “It vibrated so you were aware if you accidentally covered it.” [Parent] |
| Tracks UV radiation | 0 (0)a | 10 (11.4)b | - “It tracks how much sunlight you're getting so that you can make predictions to help yourself in the future.” [Child] |
| **What were challenges of wearing the Shade device?** |  |  |  |
| Remembering to wear it | 13 (14.6)c | 21 (24.1)d | - “Remembering to put it on in the mornings.” [Child] - “Remembering to put it on.” [Parent] |
| Keeping the device uncovered | 34 (38.2)c | 23 (26.1)d | - “It vibrated when I covered it up like with a seatbelt or blanket.” [Child] - “Making sure it is not covered by anything.” [Parent] |
| Device falling off | 21 (23.6)c | 19 (21.6)d | - “It fell off sometime when I was playing. It was easy to lose it.” [Child] - “I did some landscaping work and it fell off a few times.” [Parent] |
| Impact on daily activities | 30 (33.7)c | 17 (19.3)d | - “I couldn’t wear it while during some forms of exercise, like dance.” [Child] - “It seemed in the way. For roofing, scouts, feeding cows.” [Parent] |
| Questions from others about device | 9 (10.1)c | 6 (6.81)d | - “It was kind of annoying to constantly tell people what it was for since it was fairly large and strange looking.” [Child] - “Having it draw attention to me. It was visible so others were constantly asking me what it was.” [Parent] |

This is a Multimedia Appendix to a full manuscript published in the J Med Internet Res. For full copyright and citation information see http://dx.doi.org/10.2196/jmir.15711

aProportion calculated based on 89 responses.

bProportion calculated based on 88 responses.

cProportion calculated based on 89 responses.

dProportion calculated based on 87 responses.
